# Supplementary material for: Echogenicity as a standalone nodule characteristic is not inferior to the TIRADS systems in the 10–20 mm nodule diameter range in patient selection for fine needle aspiration: a pilot study
Source: PubMed Central journal article supplement — Eur Thyroid J. 2024 Nov 6;13(6):e240149. doi: 10.1530/ETJ-24-0149 (PMC11623266; doi:10.1530/etj-24-0149), 2024-11-06
Supplement: supplementary_table_1.pdf [file supplementary_table_1.pdf]

**Supplementary Table 1.** Case Report Form.

|                                                                                                              |
|--------------------------------------------------------------------------------------------------------------|
| 1. Is the presented lesion a nodule? (Regardless of your choice here, please proceed with the evaluation.)   |
| <input type="radio"/> Yes, it is                                                                             |
| <input type="radio"/> No, it is not a nodule and I would not describe it as a nodule in my everyday practice |
| 2. Comet-tail artifact                                                                                       |
| <input type="radio"/> Present                                                                                |
| <input type="radio"/> Absent                                                                                 |
| <input type="radio"/> Uncertain                                                                              |
| 3. Figures in the back wall of cystic areas caused by posterior acoustic enhancement                         |
| <input type="radio"/> Present                                                                                |
| <input type="radio"/> Absent                                                                                 |
| <input type="radio"/> Uncertain                                                                              |
| 4. Punctate echogenic foci (question based on ACR TI-RADS)                                                   |
| <input type="radio"/> Present                                                                                |
| <input type="radio"/> Absent                                                                                 |
| <input type="radio"/> Uncertain but probably present                                                         |
| <input type="radio"/> Uncertain but probably absent                                                          |
| 5. Unequivocal microcalcifications                                                                           |
| <input type="radio"/> Present                                                                                |
| <input type="radio"/> Absent                                                                                 |
| 6. Hyperechogenic spots of uncertain origin                                                                  |
| <input type="radio"/> Present                                                                                |
| <input type="radio"/> Absent                                                                                 |
| 7. Coarse calcification(s)                                                                                   |
| <input type="radio"/> Present                                                                                |
| <input type="radio"/> Absent                                                                                 |
| <input type="radio"/> Uncertain                                                                              |
| 8. Central intranodular coarse calcification                                                                 |
| <input type="radio"/> Present                                                                                |
| <input type="radio"/> Absent                                                                                 |
| <input type="radio"/> Uncertain                                                                              |
| 9. Isolated macrocalcification occupying an entirely calcified nodule                                        |
| <input type="radio"/> Present                                                                                |
| <input type="radio"/> Absent                                                                                 |
| <input type="radio"/> Uncertain                                                                              |
| 10. Peripheral (rim) calcification(s)                                                                        |
| <input type="radio"/> Present and disrupted with small extrusive soft tissue component                       |
| <input type="radio"/> Present and disrupted without small extrusive soft tissue component                    |
| <input type="radio"/> Present and not disrupted                                                              |
| <input type="radio"/> Absent                                                                                 |
| <input type="radio"/> Uncertain                                                                              |
| 11. Composition of the nodule                                                                                |
| <input type="radio"/> Pure cyst                                                                              |
| <input type="radio"/> Cystic or almost completely cystic                                                     |
| <input type="radio"/> Spongiform                                                                             |

|                                                                                                                                                |
|------------------------------------------------------------------------------------------------------------------------------------------------|
| <input type="radio"/> Mixed cystic and solid                                                                                                   |
| <input type="radio"/> Solid or almost completely solid                                                                                         |
| <input type="radio"/> Cannot be determined because of calcification(s)                                                                         |
| <b>12. Is the nodule partially cystic?</b>                                                                                                     |
| <input type="radio"/> No                                                                                                                       |
| <input type="radio"/> Yes, and the solid part is eccentric                                                                                     |
| <input type="radio"/> Yes, and the solid part is not eccentric                                                                                 |
| <b>13. Echogenicity</b>                                                                                                                        |
| <input type="radio"/> Hyperechoic or isoechoic                                                                                                 |
| <input type="radio"/> Mildly to moderately hypoechoic                                                                                          |
| <input type="radio"/> Very hypoechoic                                                                                                          |
| <input type="radio"/> Anechoic                                                                                                                 |
| <input type="radio"/> Cannot be determined                                                                                                     |
| <b>14. Nodule margin</b>                                                                                                                       |
| <input type="radio"/> Smooth                                                                                                                   |
| <input type="radio"/> Ill-defined                                                                                                              |
| <input type="radio"/> Lobulated or irregular                                                                                                   |
| <input type="radio"/> Cannot be determined                                                                                                     |
| <b>15. Extrathyroidal extension</b>                                                                                                            |
| <input type="radio"/> Present                                                                                                                  |
| <input type="radio"/> Absent                                                                                                                   |
| <b>16. Based merely on nodule ultrasound characteristics, would you recommend aspiration cytology?</b>                                         |
| <input type="radio"/> Yes                                                                                                                      |
| <input type="radio"/> No                                                                                                                       |
| <b>17. Considering both the nodule characteristics and the provided (often limited) patient data, would you recommend aspiration cytology?</b> |
| <input type="radio"/> Yes                                                                                                                      |
| <input type="radio"/> No                                                                                                                       |
